# Supplementary material for: Multianalyte serology in home-sampled blood enables an unbiased assessment of the immune response against SARS-CoV-2
Source: PubMed Central journal article supplement (PMC8211676; doi:10.1038/s41467-021-23893-4), 2021-06-17
Supplement: 41467_2021_23893_MOESM3_ESM.pdf [file 41467_2021_23893_MOESM3_ESM.pdf]

### **Description of Additional Supplementary Files**

File Name: Supplementary Data 1

Description: The file contains tables concerning the performance of the antigens in the different assays, in sheets named Prevalence per Antigen, Combinatorial prevalence, Paired antigens pilot test, Paired samples pilot test)
